# Supplementary material
Source: PubMed Central journal article supplement (PMC10203057)
Supplement: NIHMS1872702-supplement-Supp1.pdf [file NIHMS1872702-supplement-Supp1.pdf]

Supplemental file 1

Table S1. IQOS unique ads characteristics and themes by regulatory periods, Israel, 12/2016-08/2020

| Variables                                     | Regulatory periods* |                   |                   |                   | p-value <sup>†</sup> |
|-----------------------------------------------|---------------------|-------------------|-------------------|-------------------|----------------------|
|                                               | 1 (n=7)<br>N (%)    | 2 (n=77)<br>N (%) | 3 (n=29)<br>N (%) | 4 (n=17)<br>N (%) |                      |
| <b>Ad characteristics:</b>                    |                     |                   |                   |                   |                      |
| <b>Setting</b>                                |                     |                   |                   |                   | <.001                |
| <i>Indoors</i>                                | 2 (28.6)            | 22 (28.6)         | 2 (6.9)           | 9 (52.9)          |                      |
| <i>Outdoors</i>                               | 1 (14.3)            | 6 (7.8)           | 8 (27.6)          | 5 (29.4)          |                      |
| <i>Colored/ambiguous background</i>           | 4 (57.1)            | 49 (63.6)         | 19 (65.5)         | 3 (17.6)          |                      |
| <b>Product presentation</b>                   |                     |                   |                   |                   |                      |
| <i>Packaging<sup>#</sup></i>                  | 2 (28.6)            | 38 (53.5)         | 22 (100.0)        | 0 (0.0)           | <.001                |
| <i>Flavor/sub-brand indicated<sup>#</sup></i> | 5 (71.4)            | 69 (97.2)         | 22 (100.0)        | 16 (100.0)        | .04                  |
| <i>Product is lit<sup>‡</sup></i>             | 5 (83.3)            | 66 (95.7)         | 22 (100.0)        | 15 (88.2)         | .14                  |
| <b>Information included within the ad:</b>    |                     |                   |                   |                   |                      |
| <i>Age and user restrictions</i>              | 7 (100.0)           | 69 (89.6)         | 29 (100.0)        | 17 (100.0)        | .19                  |
| <i>Retail accessibility</i>                   | 1 (14.3)            | 33 (42.9)         | 23 (79.3)         | 16 (94.1)         | <.001                |
| <i>Additional details cue</i>                 | 3 (42.9)            | 75 (97.4)         | 28 (96.6)         | 17 (100.0)        | <.001                |
| <i>Price promotion</i>                        | 0 (0.0)             | 2 (2.6)           | 10 (34.5)         | 1 (5.9)           | <.001                |
| <i>Other promotions</i>                       | 0 (0.0)             | 1 (1.3)           | 10 (3.4)          | 0 (0.0)           | <.001                |
| <b>Ad themes:</b>                             |                     |                   |                   |                   |                      |
| <b>Product features:</b>                      |                     |                   |                   |                   |                      |
| <i>Quality</i>                                | 0 (0.0)             | 9 (11.7)          | 1 (3.4)           | 3 (17.6)          | .36                  |
| <i>Popular product</i>                        | 1 (14.3)            | 9 (11.7)          | 3 (10.3)          | 0 (0.0)           | .51                  |
| <i>Stylish</i>                                | 0 (0.0)             | 9 (11.7)          | 0 (0.0)           | 0 (0.0)           | .13                  |
| <i>Easy to use</i>                            | 0 (0.0)             | 9 (11.7)          | 0 (0.0)           | 0 (0.0)           | .13                  |
| <i>Technology</i>                             | 5 (71.4)            | 70 (90.9)         | 18 (62.1)         | 17 (100.0)        | .12                  |
| <i>Innovation</i>                             | 1 (14.3)            | 3 (3.9)           | 6 (20.7)          | 0 (0.0)           | .02                  |
| <i>Reference to legislation/policy</i>        | 0 (0.0)             | 6 (7.8)           | 1 (3.4)           | 0 (0.0)           | .74                  |
| <b>Social norms and related factors:</b>      |                     |                   |                   |                   |                      |
| <i>Presence of everyday items</i>             | 3 (42.9)            | 22 (28.6)         | 3 (10.3)          | 6 (35.3)          | .09                  |
| <i>Socializing with non-smokers</i>           | 2 (28.6)            | 7 (9.1)           | 3 (10.3)          | 0 (0.0)           | .18                  |
| <i>Freedom/choice</i>                         | 0 (0.0)             | 13 (16.9)         | 15 (51.7)         | 0 (0.0)           | <.001                |
| <i>High social status</i>                     | 0 (0.0)             | 9 (11.7)          | 1 (3.4)           | 3 (17.6)          | .36                  |
| <i>Special occasion/event</i>                 | 0 (0.0)             | 3 (3.9)           | 10 (34.5)         | 0 (0.0)           | <.001                |
| <b>Comparative claims:</b>                    |                     |                   |                   |                   |                      |
| <i>Same/similar/better taste</i>              | 0 (0.0)             | 8 (10.4)          | 1 (3.4)           | 3 (17.6)          | .36                  |
| <i>No or less smell/no bad smell</i>          | 7 (100.0)           | 27 (35.1)         | 4 (13.8)          | 9 (52.9)          | <.001                |
| <i>No ash</i>                                 | 7 (100.0)           | 14 (18.2)         | 9 (31.0)          | 14 (82.4)         | <.001                |
| <i>No combustion</i>                          | 7 (100.0)           | 25 (32.5)         | 23 (79.3)         | 17 (100.0)        | <.001                |
| <i>No smoke</i>                               | 1 (14.3)            | 28 (36.4)         | 23 (79.3)         | 12 (70.6)         | <.001                |
| <i>Alternative to smoking</i>                 | 0 (0.0)             | 12 (15.6)         | 11 (37.9)         | 6 (35.3)          | .02                  |
| <i>As satisfying</i>                          | 0 (0.0)             | 12 (15.6)         | 7 (24.1)          | 13 (76.5)         | <.001                |
| <i>No or reduced harm/risk</i>                | 0 (0.0)             | 5 (6.5)           | 0 (0.0)           | 0 (0.0)           | .48                  |

N/A – Non-applicable. <sup>†</sup>Fischer's exact test. \*Five IQOS ads appeared in more than one regulatory period.

<sup>#</sup>Proportion is calculated from ads that presented HEETS in regulatory period 1 (N=7), 2 (N=71), 3 (N=22) and 4 (N=16).

<sup>‡</sup>Proportion is calculated from ads that presented the IQOS device in regulatory periods 1 (N=6), 2 (N=69), 3 (N=22) and 4 (N=17).

**Table S2. PMI cigarette unique ad characteristics and themes by regulatory period, Israel, 12/2016-08/2020**

| Variables                                     | Regulatory periods* |                   |                  | p-value <sup>†</sup> |
|-----------------------------------------------|---------------------|-------------------|------------------|----------------------|
|                                               | 2 (n=49)<br>N (%)   | 3 (n=20)<br>N (%) | 4 (n=4)<br>N (%) |                      |
| <b>Ad characteristics:</b>                    |                     |                   |                  |                      |
| <b>Setting</b>                                |                     |                   |                  | .05                  |
| <i>Indoors</i>                                | 0 (0.0)             | 0 (0.0)           | 1 (25.0)         |                      |
| <i>Outdoors</i>                               | 6 (12.2)            | 5 (25.0)          | 0 (0.0)          |                      |
| <i>Colored/ambiguous background</i>           | 43 (87.8)           | 15 (75.0)         | 3 (75.0)         |                      |
| <b>Product presentation</b>                   |                     |                   |                  |                      |
| <i>Packaging<sup>#</sup></i>                  | 49 (100.0)          | 18 (94.7)         | 3 (75.0)         | .32                  |
| <i>Flavor/sub-brand indicated<sup>#</sup></i> | 48 (98.0)           | 19 (100.0)        | 4 (100.0)        | 1.00                 |
| <b>Information included within the ad:</b>    |                     |                   |                  |                      |
| <i>Age and user restrictions</i>              | 10 (20.4)           | 1 (5.0)           | 1 (25.0)         | .26                  |
| <i>Additional details cue</i>                 | 21 (42.9)           | 2 (10.0)          | 1 (25.0)         | .02                  |
| <i>Price promotion</i>                        | 28 (57.1)           | 9 (45.0)          | 0 (0.0)          | .07                  |
| <i>Other promotions</i>                       | 6 (12.2)            | 0 (0.0)           | 0 (0.0)          | .23                  |
| <b>Ad themes:</b>                             |                     |                   |                  |                      |
| <b>Product features:</b>                      |                     |                   |                  |                      |
| <i>Quality</i>                                | 25 (51.0)           | 11 (55.0)         | 1 (25.0)         | .63                  |
| <i>Popular product</i>                        | 3 (6.1)             | 4 (20.0)          | 0 (0.0)          | .27                  |
| <i>Stylish</i>                                | 4 (8.2)             | 1 (5.0)           | 0 (0.0)          | 1.00                 |
| <i>Technology</i>                             | 20 (40.8)           | 0 (0.0)           | 0 (0.0)          | .001                 |
| <i>Innovation</i>                             | 1 (2.0)             | 1 (5.0)           | 0 (0.0)          | .553                 |
| <b>Reference to legislation/policy</b>        | 0 (0.0)             | 5 (25.0)          | 3 (75.0)         | <.001                |
| <b>Social norms and related factors:</b>      |                     |                   |                  |                      |
| <i>Presence of everyday items</i>             | 1 (2.0)             | 1 (5.0)           | 2 (50.0)         | .02                  |
| <i>Freedom/choice</i>                         | 15 (30.6)           | 1 (5.0)           | 3 (75.0)         | .005                 |
| <i>High social status</i>                     | 6 (12.2)            | 5 (25.0)          | 1 (25.0)         | .31                  |
| <i>Special occasion/event</i>                 | 8 (16.3)            | 0 (0.0)           | 0 (0.0)          | .17                  |
| <b>Comparative claims:</b>                    |                     |                   |                  |                      |
| <i>Same/similar/better taste</i>              | 9 (18.4)            | 9 (45.0)          | 4 (100.0)        | <.001                |
| <i>No or less smell/no bad smell</i>          | 23 (46.9)           | 3 (15.0)          | 0 (0.0)          | .01                  |

PMI – Phillip Morris International. N/A – Non-applicable. <sup>†</sup>Fischer's exact test. \*Two cigarette ads appeared in more than one regulatory period.

<sup>#</sup>Proportion is calculated from ads that presented cigarettes in regulatory periods 2 (N=49), 3 (N=19) and 4 (N=4).
